1  
2  
3  
4  
5  
6  
7  
8  
9  
10  
11  
12  
13  
14  
15  
16  
17  
18  
19  
20  
21  
22

## Identification and characterization of zebrafish Tlr4 co-receptor Md-2

*Andrea N. Loes<sup>1,3</sup>, Melissa N. Hinman<sup>1,4</sup>, Dylan R. Farnsworth<sup>2,4</sup>, Adam C. Miller<sup>2,4</sup>, Karen  
Guillemin<sup>1,4,5</sup>, Michael J. Harms<sup>1,3</sup>*

<sup>1</sup>Institute of Molecular Biology, <sup>2</sup>Institute of Neuroscience, <sup>3</sup>Department of Chemistry and  
Biochemistry, <sup>4</sup>Department of Biology, University of Oregon, Eugene, OR 97403, <sup>5</sup>Humans and  
the Microbiome Program, CIFAR, Toronto, Ontario M5G 1Z8, Canada

### Funding sources:

This research was funded by grants from the American Heart Association (AHA-  
15BGIA22830013, MJH) and the National Institutes of Health (NIH-T32GM007413, ANL,  
NIH-F32DK107318, MNH, P50GM09891, KG, NIH-R24OD026591, ACM). MJH is a Pew  
Scholar in the Biomedical Sciences, supported by The Pew Charitable Trusts. The funders had  
no role in study design, data collection and analysis, decision to publish, or preparation of the  
manuscript.

## 23 SUPPLEMENTAL MATERIAL

- 24 Fig S1: Alignment of Md-2 proteins from amphibians and various fishes  
25 Fig S2: Human and zebrafish gene context BLAST hits on bamboo shark chromosomes  
26 Fig S3: Human and zebrafish gene context BLAST hits on human chromosomes  
27 Fig S4: Human and zebrafish gene context BLAST hits on chicken chromosomes  
28 Fig S5: Human and zebrafish gene context BLAST hits on frog chromosomes  
29 Fig S6: Human and zebrafish gene context BLAST hits on gar chromosomes  
30 Fig S7: Human and zebrafish gene context BLAST hits on bonytongue chromosomes  
31 Fig S8: Human and zebrafish gene context BLAST hits on catfish chromosomes  
32 Fig S9: Human and zebrafish gene context BLAST hits on zebrafish chromosomes  
33 Fig S10: Human and zebrafish gene context BLAST hits on pike chromosomes  
34 Fig S11: Human and zebrafish gene context BLAST hits on cod chromosomes  
35 Fig S12: Human and zebrafish gene context BLAST hits on puffer chromosomes  
36 Fig S13: Comparison of zebrafish Tlr4a sequence used in this paper versus previous work  
37  
38 Table S1: Gene locations for *ly96* synteny analysis  
39 Table S2: Predicted zebrafish *ly96* mutant gene products  
40 Table S3: Genomes used for *tlr4* synteny analysis  
41 Table S4: Genes used to BLAST for human vs. zebrafish *Tlr4* genomic context  
42  
43 File S1: Spreadsheet containing accession numbers and aligned sequences for Md-1 and Md-2  
44 sequences.  
45 File S2: Spreadsheet containing accession numbers and aligned sequences for Tlr4 and Cd180  
46 sequences.  
47  
48  
49

50 **ABSTRACT**

51           The zebrafish (*Danio rerio*) is a powerful model organism for studies of the innate  
52 immune system. One apparent difference between human and zebrafish innate immunity is the  
53 cellular machinery for LPS-sensing. In amniotes, the protein complex formed by Toll-like  
54 receptor 4 and myeloid differentiation factor 2 (Tlr4/Md-2) recognizes the bacterial molecule  
55 lipopolysaccharide (LPS) and triggers an inflammatory response. It is believed that zebrafish  
56 have neither Md-2 nor Tlr4: Md-2 has not been identified outside of amniotes, while the  
57 zebrafish *tlr4* genes appear to be paralogs, not orthologs, of amniote *TLR4s*. We revisited these  
58 conclusions. We identified a zebrafish gene encoding Md-2, *ly96*. Using single-cell RNA-Seq,  
59 we found that *ly96* is transcribed in cells that also transcribe genes diagnostic for innate immune  
60 cells, including the zebrafish *tlr4*-like genes. Unlike amniote *LY96*, zebrafish *ly96* expression is  
61 restricted to a small number of macrophage-like cells. In a functional assay, zebrafish Md-2 and  
62 Tlr4a form a complex that activates NF- $\kappa$ B signaling in response to LPS, but *ly96* loss-of-  
63 function mutations gave little protection against LPS-toxicity in larval zebrafish. Finally, by  
64 analyzing the genomic context of *tlr4* genes in eleven jawed vertebrates, we found that *tlr4* arose  
65 prior to the divergence of teleosts and tetrapods. Thus, an LPS-sensitive Tlr4/Md-2 complex is  
66 likely an ancestral feature shared by mammals and zebrafish, rather than a *de novo* invention on  
67 the tetrapod lineage. We hypothesize that zebrafish retain an ancestral, low-sensitivity Tlr4/Md-2  
68 complex that confers LPS-responsiveness to a specific subset of innate immune cells.

69

70

71 **INTRODUCTION**

72 Amniote innate immune systems are exquisitely sensitive to lipopolysaccharide (LPS), a  
73 component of the cell wall in Gram-negative bacteria (1–3). LPS is sensed by a protein complex  
74 composed of Toll-like receptor 4 (Tlr4) and Md-2 (also known as LY96 and ESOP-1) (1, 4). LPS  
75 binds in a pocket of Md-2, triggering dimerization of the Tlr4/Md-2 complex (Fig 1) (5). This, in  
76 turn, activates a Myd88-dependent NF- $\kappa$ B response (6). When properly regulated, the LPS  
77 activation of Tlr4/Md-2 regulates microbiome populations (7), recruits neutrophils to sites of  
78 infection (8), and induces angiogenesis (9). When dysregulated, Tlr4/Md-2 activity induces  
79 septic shock (10, 11), plays roles in inflammatory disorders (11, 12), and is a key player in the  
80 tissue remodeling that accompanies tumorigenesis (13, 14).

81 The role of Tlr4/Md-2 in LPS-sensing outside of amniotes remains poorly understood.  
82 Understanding this response in zebrafish (*Danio rerio*) is of particular interest, as the zebrafish is  
83 a powerful model organism for studies of vertebrate innate immunity (15). Zebrafish have  
84 mature genetic resources, rapid generation time, clear embryos, and facile germ-free derivation  
85 (16, 17). The zebrafish is increasingly popular as a model for understanding host-microbe  
86 interactions (18), as well as a tool to understand the development of the innate immune system  
87 (16).

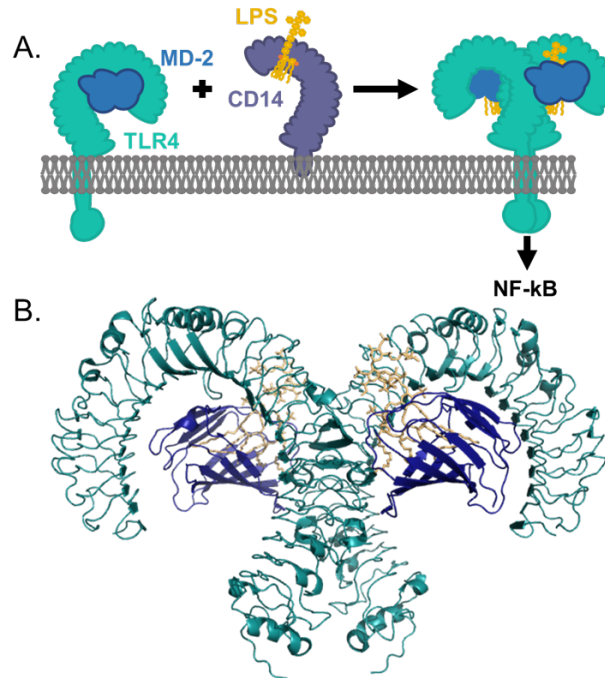

88

89 **Fig 1. LPS activation of amniote Tlr4 requires cofactors Md-2 and Cd14.** A) Schematic  
90 representation of LPS transfer from Cd14 to the Tlr4/Md-2 complex. LPS (yellow) is brought  
91 by Cd14 (purple) and loaded into Md-2 (navy blue). Md-2 is bound by Tlr4 (cyan). Binding of LPS  
92 to the Md-2 co-receptor causes dimerization of the Tlr4/Md-2 complex, activating a downstream  
93 inflammatory response. B) The interface between human Tlr4 (cyan) and Md-2 (navy blue) is  
94 extensive. Both are required to form a productive interaction with LPS (yellow). Structure shown  
95 was made from PDB 3FXI (19).

96

97 The zebrafish response to LPS is puzzling (20, 21). In some ways it is similar to  
98 amniotes. As in amniotes, LPS triggers Myd88-dependent NF-κB inflammatory response (22,  
99 23). Further, the expression patterns of genes induced by LPS stimulation are highly similar  
100 between mouse and zebrafish (24). There are, however, several lines of evidence that suggest  
101 Tlr4/Md-2 is not involved. Most critically, the gene encoding the essential co-receptor Md-2 has  
102 not been identified in zebrafish and other ray-finned fishes (20, 21, 25). Further, zebrafish Tlr4  
103 proteins do not activate NF-κB in response to LPS in *ex vivo* assays, even when complemented  
104 with a mouse or human Md-2 (20, 21). Finally, zebrafish do not have a direct ortholog to  
105 amniote *tlr4*. Rather, they possess three *tlr4*-like genes—*tlr4ba*, *tlr4bb*, and *tlr4a1*—that are

106 thought to have arisen from an ancestral Toll-like receptor lost in tetrapods but retained in ray-  
107 finned fishes (21). These observations have led to the hypothesis that zebrafish respond to LPS  
108 by a non-Tlr4/Md-2-dependent pathway.

109 We set out to carefully revisit these conclusions using resources unavailable when the  
110 initial investigations of zebrafish Tlr4 were performed. Using careful bioinformatics, we found  
111 an ortholog of the gene encoding Md-2 (*ly96*) in zebrafish and other ray-finned fishes. When co-  
112 transfected into mammalian cells, the zebrafish *ly96* and *tlr4ba* genes activate NF- $\kappa$ B signaling  
113 in response to LPS. Single-cell RNA-seq experiments on larval zebrafish revealed that the gene  
114 is expressed in a small subset of cells that express the zebrafish *tlr4*-like genes and the  
115 macrophage-specific gene *mpeg1.1* (26). This contrasts with amniotes, in which *TLR4* and *LY96*  
116 are both broadly expressed (27). Further, unlike mammalian *TLR4* and *LY96* mutants that  
117 exhibit increased resistance to systemic LPS challenge (4, 28), zebrafish larvae with loss of  
118 function *ly96* mutations are not protected from LPS toxicity. Finally, we revisited the history of  
119 the *tlr4* gene in zebrafish, finding that formation of an LPS-sensitive Tlr4/Md-2 complex is  
120 likely an ancestral feature shared by mammals and zebrafish, rather than a *de novo* invention on  
121 the tetrapod lineage. We hypothesize that zebrafish preserve an ancestral, low-sensitivity  
122 Tlr4/Md-2 complex that plays an LPS-sensing role in a small population of innate immune cells.

123

## 124 **MATERIALS & METHODS**

### 125 ***Phylogenetic reconstruction analysis***

126 We constructed curated databases of Md-1, Md-2, Tlr4, and Cd180 protein sequences  
127 from across the vertebrates. Cd180 and Md-1 are paralogs of Tlr4 and Md-2, respectively (29).  
128 We obtained amino acid sequences of these proteins from NCBI, Ensembl, Fish1TK, amphibian  
129 transcriptomes (30–33), UniProt, and ZFIN. We constructed a multiple sequence alignment for

130 Tlr4 and Cd180 and for Md-2 and Md-1 using MSAPROBS (34), followed by manual editing in  
131 MEGA (35). We trimmed the alignment to remove highly variable (and therefore unalignable)  
132 regions. We used PHYML (36, 37) with subtree pruning and re-grafting to construct the ML  
133 phylogeny. Pilot analyses revealed that the JTT substitution model with 8 rate categories and a  
134 floating gamma distribution parameter yielded the highest likelihood trees (38–40). An Akaike  
135 information criterion (AIC) test was used to control for overfitting (41). We rooted our trees at  
136 the duplication of these proteins in early vertebrates. Alignment figures in supplement were  
137 made with JalView (42).

138

### 139 *Synteny analysis*

140 For the *ly96* synteny analysis, we used the Ensembl synteny module (43) to map  
141 homologs onto the chromosomes of species of interest. For the *tlr4* synteny analysis, we took the  
142 22 genes flanking human *TLR4* (11 on each side) and the 22 genes flanking zebrafish *tlr4*. We  
143 used tblastn with default parameters to BLAST these sequences against 11 vertebrate genomes.  
144 We discarded all hits with e-value < 0.001 and then calculated a running average of the log (e-  
145 value) along each chromosome with a sliding window of 10,000 bases. Finally, we divided this  
146 running average by the maximum observed log (e-value)/bp value across all genomes. This  
147 value occurs for the window centered on the zebrafish *tlr4* gene. On the final relative scale, 0.0  
148 indicates no hits observed in a given window and 1.0 is the maximum e-value per base pair. The  
149 complete analysis pipeline is implemented in a collection of shell scripts and jupyter notebooks  
150 (<https://github.com/harmslab/vertebrate-tlr4-synteny/>).

151

152

153 ***Gene expression analysis***

154 Whole 6 days post fertilization (dpf) zebrafish were euthanized by tricaine methane  
155 sulfonate overdose, flash frozen in 1 mL of Trizol (Ambion), thawed, and homogenized.  
156 Chloroform (200  $\mu$ L) was added to each tube followed by mixing, centrifugation at 12,000 g for  
157 10 minutes at 4°C, transfer of the aqueous phase to a separate tube, addition of 200  $\mu$ L ethanol,  
158 and binding of sample to an RNeasy mini kit column (Qiagen). RNA was washed and eluted  
159 according to the manufacturer's instructions and treated with RQ1 DNase (Promega). RNA was  
160 reverse transcribed into cDNA using Superscript II Reverse Transcriptase (Invitrogen) and an  
161 oligo dT (20) primer, then amplified by PCR using gene-specific primers for zebrafish *ly96* (5' -  
162 TGTATGGCATCTGAGAAAGCAGA - 3' and 5' - AAGAGCAGGGGGAAACAGTC - 3') and  
163 the housekeeping gene *b2m* (5' - ACGCTGCAGGTATATTCATC - 3' and 5' -  
164 TCTCCATTGAACTGCTGAAG - 3'). PCR products were separated by electrophoresis on a 6%  
165 *bis*-Acrylamide (19:1) gel that was stained with 1X SYBR green 1 nucleic acid gel stain  
166 (Invitrogen) and imaged using an AlphaImagerHP (Alpha Innotech). The identity of the *ly96* RT-  
167 PCR product was verified by Sanger sequencing.

168

169 ***Single-cell RNA-Seq***

170 Single-cell analysis of transcription patterns of *ly96*, *tlr4ba*, *tlr4bb*, and *tlr4a1* was performed  
171 using the recently released Zebrafish Single-Cell Transcriptome Atlas (44). Briefly, dissociated  
172 cells were run on a 10X Chromium platform using v2 chemistry. Dissociated samples for each  
173 time point (1, 2 and 5 dpf) were submitted in duplicate to determine technical reproducibility.  
174 The resulting cDNA libraries were sequenced on either an Illumina Hi-seq or an Illumina Next-  
175 seq. The resulting sequencing data were analyzed using the 10X Cellranger pipeline, version



176 2.2.0 (45) and the Seurat software package for R, v3.4.4 (46, 47) using standard quality control,  
177 normalization, and analysis steps. We aligned reads to the zebrafish genome, GRCz11\_93, and  
178 counted expression of protein coding reads. The resulting matrices were read into Seurat where  
179 we performed PCA and UMAP analysis on the resulting dataset with 178 dimensions and a  
180 resolution of 13.0, which produced 220 clusters and one singleton. Differential gene expression  
181 analysis was performed using the FindAllMarkers function in Seurat and Wilcoxon rank sum  
182 test.

183

#### 184 ***Cell Culture and Transfection Conditions***

185 Mammalian expression vectors containing human *TLR4* and mouse *Tlr4* were obtained  
186 from Addgene (#13085 and #13086), originally deposited by Ruslan Medzhitov. Human *CD14*  
187 and *ELAM-Luc* were also obtained from Addgene (#13645 and #13029) originally deposited by  
188 Doug Golenbock. Human *MD-2* was obtained from the DNASU Repository (HsCD00439889)  
189 and contains a C-terminal V5-tag. Mouse *Md-2* (UniProt #Q9JHF9) and *Cd14* (UniProt  
190 #P10810), as well as opossum *Md-2* (UniProt #F6QBE6), *Cd14* (NCBI Accession  
191 #XP\_007473804.1) and chicken *Md-2* (UniProt #A0A1D5NZX9), and *Cd14* (UniProt  
192 #B0BL87) were designed to be free of restriction sites, codon-optimized for human expression,  
193 and purchased as mammalian expression vector constructs in pcDNA3.1 (+) from Genscript  
194 (New Jersey, USA). Zebrafish *tlr4ba* and *ly96* were also obtained from Genscript in pcDNA3.1  
195 (+). Zebrafish *tlr4bb* was a gift from Carol Kim. We re-cloned this protein from its original  
196 vector into pcDNA3.1 (+) to limit variability in expression due to differences in vector size and  
197 promoter.

198 Human embryonic kidney cells (HEK293T/17, ATCC CRL-11268) were maintained up  
199 to 30 passages in DMEM supplemented with 10% FBS at 37° C with 5% CO<sub>2</sub>. For each  
200 transfection, a confluent 100 mm plate of HEK293T/17 cells was treated at room temperature  
201 with 0.25% Trypsin-EDTA in HBSS and resuspended with an addition of DMEM + 10% FBS.  
202 This was diluted 4-fold into fresh medium and 135 µL aliquots of resuspended cells were  
203 transferred to a 96-well cell culture treated plate. Transfection mixes were made with 10 ng of  
204 *tlr4*, 1 ng of *cd14*, 10 ng of *ly96*, 1 ng of *Renilla*, 20 ng of *ELAM-Luc*, and 58 ng of pcDNA3.1  
205 (+) per well for a total of 100 ng of DNA, diluted in OptiMEM to a volume of 10 µL/well. To the  
206 DNA mix, 0.5 µL per well of PLUS reagent was added followed by a brief vortex and room  
207 temperature incubation for 10 min. Lipofectamine was diluted 0.5 µL into 9.5 µL OptiMEM per  
208 well. This was added to the DNA + PLUS mix, vortexed briefly and incubated at RT for 15 min.  
209 The transfection mix was diluted to 65 µL/well in OptiMEM and aliquoted onto a plate. Cells  
210 were incubated with transfection mix overnight (20-22 hrs) and then treated with LPS. *E. coli* K-  
211 12 lipopolysaccharide (LPS) (tlrl-eklps, Invivogen) was dissolved at 5 mg/mL in endotoxin-free  
212 water, and aliquots were stored at -20° C. To avoid freeze-thaw cycles, working stocks of LPS  
213 were prepared at 10 µg/mL and stored at 4° C. To prepare treatments, LPS was diluted in 25%  
214 phosphate buffered saline and 75% DMEM. Cells were incubated with treatments for 4 hr. The  
215 Dual-Glo Luciferase Assay System (Promega) was used to assay Firefly and Renilla luciferase  
216 activity of individual wells. Each NF-κB induction value shown represents the Firefly luciferase  
217 activity/Renilla luciferase activity, normalized to the buffer treated transfection control to  
218 compare fold-change in NF-κB activation for treatments.

219

220

## 221 ***Generation of mutant zebrafish***

222 Zebrafish experiments were approved by the University of Oregon Institutional Animal  
223 Care and Use Committee. Chop Chop (<http://chopchop.cbu.uib.no>) was used to design a guide  
224 RNA (gRNA) targeting the first exon of zebrafish *ly96* (si:dkey-82k12.13, GRCz11). A gRNA  
225 template was generated by a template-free Phusion polymerase (New England Biolabs) PCR  
226 reaction using a scaffold primer (5'-  
227 GATCCGCACCGACTCGGTGCCACTTTTTCAAGTTGATAACGGACTAGCCTTATTTTA  
228 ACTTGCTATTTCTAGCTCTAAAC-3') and an *ly96*-specific primer (5'-  
229 AATTAATACGACTCACTATAGGGTATCAGATATGGCGCTTGTTTTAGAGCTAGAAAT  
230 AGC-3'), then cleaned using the QIAquick PCR Purification Kit (Qiagen), transcribed using a  
231 MEGAscript kit (Ambion), and purified by phenol-chloroform extraction and isopropanol  
232 precipitation. Cas9 RNA was made by linearizing the pT3TS-nls-zCas9-nls plasmid (41) with  
233 XbaI, purifying it using the QIAquick Gel Extraction Kit (Qiagen), performing an in vitro  
234 transcription reaction using the T3 mMESSAGE kit (Invitrogen), and purifying the RNA using  
235 the RNeasy Mini kit (Qiagen). AB strain zebrafish embryos were microinjected at the one cell  
236 stage with 1-2 nL of a mixture containing 100 ng/ $\mu$ L Cas9 mRNA, 50 ng/ $\mu$ L gRNA, and phenol  
237 red, and raised to adulthood. Fin DNA was amplified by PCR using primers specific to the  
238 targeted region (5'- CAAATTGGATTCAACAACAGAGC -3' and 5' -  
239 CCATGGAAAATCAATGAAAAGC - 3'). Mosaic mutants were identified based on loss of an  
240 HaeII restriction site and were outcrossed to wildtype AB zebrafish to generate heterozygotes.  
241 Fish with loss-of-function mutations were identified by Sanger sequencing and further crossed to  
242 generate three independent homozygous *ly96* mutant lines.

243

244 ***Fish LPS survival assay***

245 WT and homozygous *ly96* mutant zebrafish embryos were grown under standard  
246 conditions in separate 10 cm petri dishes at a density of one fish per mL of embryo medium  
247 (EM), with fifty fish total per dish. At 5 dpf, lipopolysaccharides (LPS) purified from  
248 *Escherichia coli* 0111:B4 (Sigma L2630) was dissolved in EM and added to dishes at a final  
249 concentration of 0.6 mg/mL, and control fish were mock treated with EM alone. Dead larvae, as  
250 determined by lack of heartbeat, were counted and removed at regular intervals from 16 to 48  
251 hours or from 16 to 72 hours after addition of LPS, at which time the experiment was terminated  
252 and surviving fish were humanely euthanized.

253

254 **RESULTS**

255 **Zebrafish have a gene encoding MD-2**

256 The strongest evidence against Tlr4/Md-2 performing LPS-sensing in zebrafish is the  
257 lack of Md-2. Md-2 is essential for LPS recognition by amniote Tlr4, as it contains the LPS  
258 binding pocket (Fig 1). We therefore asked whether we could find a gene encoding Md-2 in bony  
259 fishes.

260 We started by using the human MD-2 protein sequence to BLAST against the zebrafish  
261 genome and transcriptomes. This returned no significant hits, so we took a more  
262 phylogenetically informed strategy. Relative to humans, the earliest branching, functionally  
263 characterized Tlr4/Md-2 complex is from chicken (*Gallus gallus*). We therefore “walked out”  
264 from amniotes towards fishes, starting with amphibians. We BLASTed the human MD-2 protein  
265 sequence against the *Xenopus laevis* genome. This revealed a hit to a hypothetical protein with  
266 30% identity (OCT74818.1). When reverse-BLASTed against the human proteome, this hit

267 returned Md-2. To validate the amino acid sequence, we compared it to the sequences of  
268 functionally characterized Md-2 proteins from amniotes. We found that the *X. laevis* gene  
269 appeared to be N-terminally truncated. Using XenBase, we identified the full-length transcript in  
270 the transcriptome for *X. laevis*. By BLASTing against available amphibian transcriptomes (30–  
271 33), we further identified putative Md-2 proteins in *Rhinella marina*, *Hynobius retardatus*,  
272 *Odorrana margaretae*, and *Ichthyophis bannanicus* (Fig S1).

273 With these putative amphibian Md-2 sequences in hand, we returned to our search for a  
274 zebrafish Md-2. A BLAST against a zebrafish transcriptome using the *X. laevis* sequence  
275 revealed a likely transcript (si:dkey-82k12.13, 23% identity). We then searched additional fish  
276 transcriptomes available from the Fish-T1K project (49) and identified a set of transcripts from  
277 three species that matched Md-2 (Fig S1). The genes we identified in bony fishes that encode  
278 putative Md-2 proteins were highly diverged. On average, they exhibited only 26% identity  
279 against human Md-2, and only ~40% identity relative to one another.

280 We next set out to assign the orthology of these putative Md-2 sequences. Our primary  
281 concern was that these newly identified sequences were paralogs of Md-2. We therefore built a  
282 phylogenetic tree to elucidate whether these newly identified sequences grouped with Md-2 or  
283 with its direct paralog, Md-1. We constructed an alignment of 294 Md-1 and Md-2 protein  
284 sequences sampled from amniotes, amphibians, and bony fishes and then used this to infer a  
285 maximum likelihood phylogeny (Fig 2A). The alignment is available in File S1.

286 The putative amphibian and bony fish Md-2 sequences grouped with the tetrapod MD-2  
287 sequences with strong support (SH = 0.99). The Md-1/Md-2 protein tree largely reproduced the  
288 species tree, with the exception of amphibians. On the Md-1 lineage, amphibians form a  
289 polytomy with fishes at the base of the tree; on the Md-2 lineage, they are placed inside the

290 amniote clade with a relatively short internal branch. This is likely an artifact of the small  
 291 number of amphibian sequences, as well as the rapid evolution of the genes along these lineages.

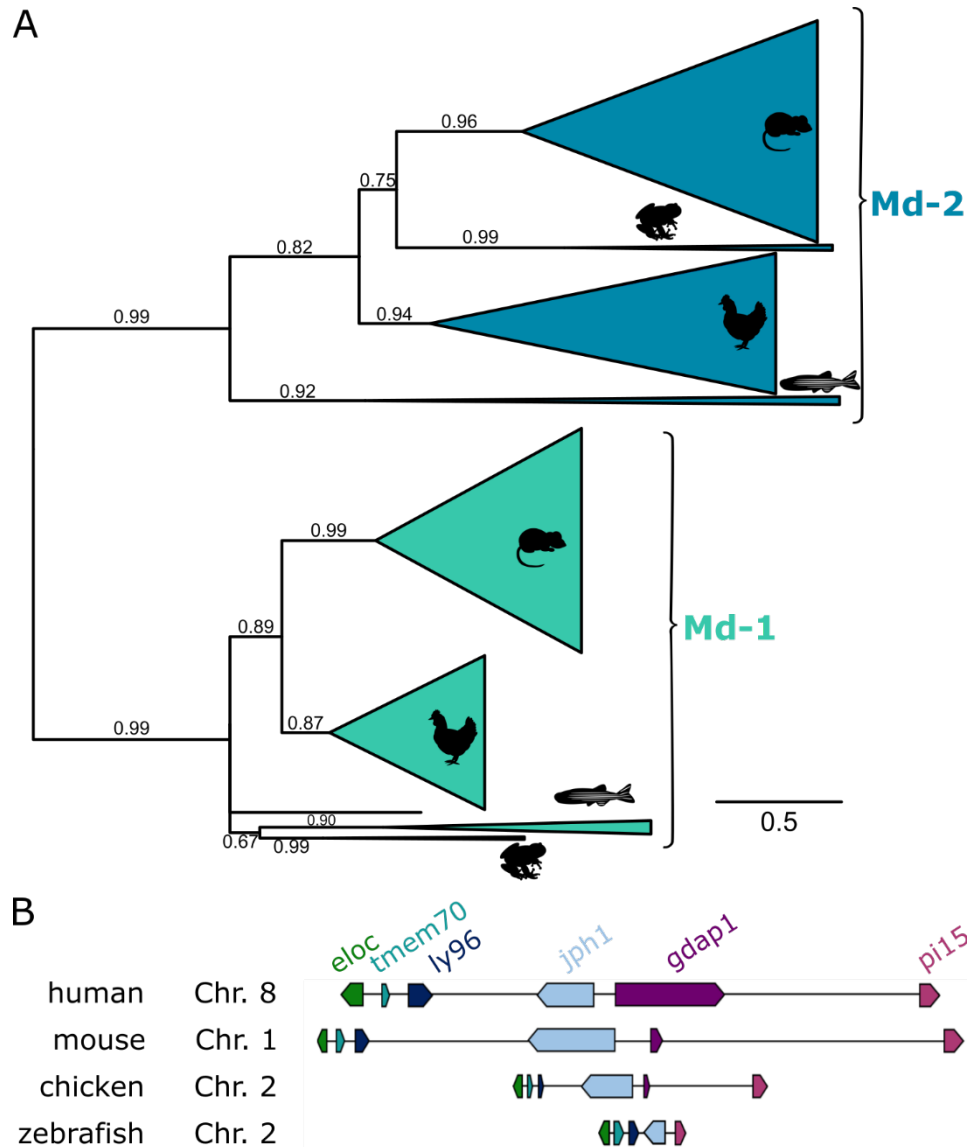

**Fig 2. Phylogeny and synteny of the identified zebrafish protein support classifying it as an Md-2 (the *ly96* gene).** A) Maximum likelihood phylogeny of Md-2 and Md-1 proteins. Wedges are collapsed clades of orthologs, with wedge height corresponding to the number of included taxa and wedge length indicating the longest branch length with the clade. Support values are SH-supports calculated using an approximate likelihood ratio test. Clades are colored to highlight Md-2 (blue) vs. Md-1 (green) classification. The taxa included in each clade are noted on the tree by silhouettes of mammals (mouse), sauropsids (chicken), amphibians (frog), and fish (zebrafish). B) Genomic organization of genes surrounding Md-2 in vertebrates. Arrows for genes represent the coding strand. Approximate distances between genes are represented by the length of line for the selected chromosome.

292 Overall, the tree is consistent with a single gene duplication event sometime before the  
293 evolution of bony vertebrates. Then, Md-1 and Md-2 were preserved along most descendant  
294 lineages. This said, the protein sequences of Md-1 and, particularly, Md-2 are evolving rapidly.  
295 The total branch lengths between the last common ancestor of Md-2 to its human and zebrafish  
296 descendants are 2.00 and 2.44, respectively. Put another way, the average site in the Md-2  
297 sequence has changed its amino acid ~2 times over the last 430 million years. Only 7 of 160  
298 positions in MD-2 are universally conserved across the clade.

299 To cross-validate the orthology of this newly identified gene, we next examined its  
300 locations in the *X. laevis* and *D. rerio* genomes. We found that the synteny is consistent with  
301 other bony vertebrates (Fig 2B). In five genomes sampled from across bony vertebrates—  
302 including *X. laevis* and *D. rerio*—the gene encoding Md-2 is located between *tmem70* and *jph1b*  
303 (Table S1). This provides strong evidence that these amphibian and fish genes are, in fact,  
304 orthologous to the amniote gene encoding Md-2. By convention, the gene encoding Md-2 is  
305 known as *ly96*. We therefore refer to this gene as zebrafish *ly96* hereafter.

306 Due to the genome duplication event that occurred along the zebrafish lineage (50), we  
307 also looked for a second copy of *ly96*. We examined the genomic location of the *jph1a* paralog,  
308 but we were unable to identify an additional gene with any similarity to *ly96*. It appears that an  
309 inversion may have occurred in this region, complicating identification by synteny alone. This  
310 said, no additional transcripts were identified within the zebrafish transcriptome with similarity  
311 to the identified zebrafish *ly96* sequence. This is consistent with a loss of the duplicate copy of  
312 this gene.

313 Finally, we attempted to identify an Md-2 sequence from earlier-diverging lineages  
314 including Chondrichthyes (cartilaginous fishes) and Agnatha (jawless fishes). Despite extensive

315 BLASTing, we were unable to identify an Md-2 protein sequence or *ly96* gene in either lineage.  
316 This is consistent with *ly96* arising after the divergence of cartilaginous and bony fishes (~470  
317 million years ago), but before the divergence of bony- and ray-finned fishes (~435 million years  
318 ago). The sequence resources for cartilaginous and jawless fishes remain relatively sparse,  
319 however, so we cannot exclude an earlier origin for *ly96*.

320

### 321 **Zebrafish transcribe *ly96* in innate immune cells**

322 We next asked whether zebrafish express *ly96*. To do so, we used the recently released  
323 Zebrafish Single-Cell Transcriptome Atlas (44). This dataset consists of single-cell RNASeq  
324 transcriptomes for 44,102 individual cells extracted from 1, 2 and 5 dpf zebrafish. The gray  
325 points in Fig 3A and 3B shows the entire Atlas: each point is a cell, plotted such that cells with  
326 similar transcription profiles appear near one another. Cluster identity can be established by  
327 examining differentially expressed transcripts and using these marker genes to assess cell type  
328 expression *in vivo* (44); this provides a means to assess which cell types express *ly96* simply by  
329 asking which clusters possess *ly96* transcripts.



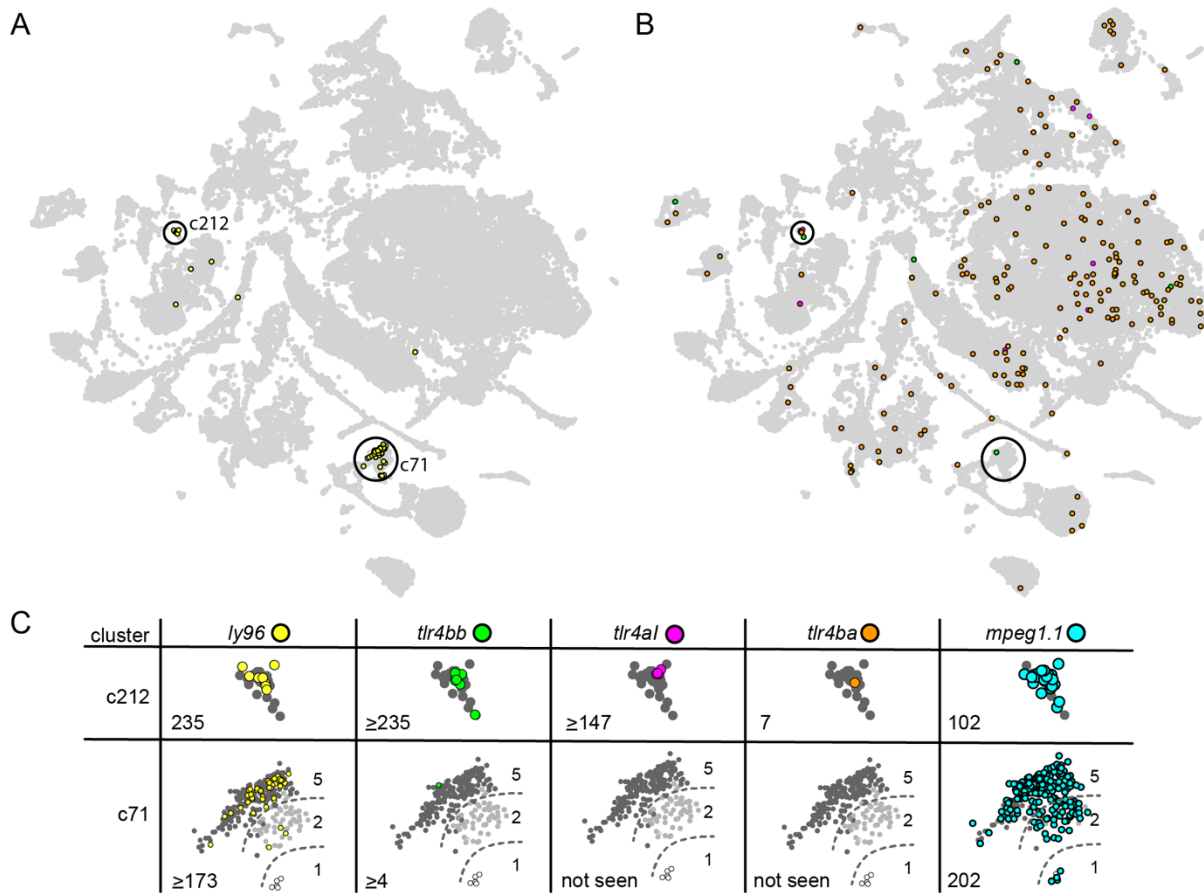

330  
331  
332  
333  
334  
335  
336  
337  
338  
339  
340  
341  
342  
343  
344  
345  
346  
347

**Fig 3. *ly96* and *tlr4* genes are expressed in macrophage cells.** Each point in these plots is an individual cell characterized by single-cell RNA-Seq. The distance between the cells corresponds to the relative difference in their transcriptional profiles (44). A) Yellow points indicate cells expressing *ly96*, gray points show all 44,102 cells in the data set. The two clusters in which *ly96* is expressed (c71 and c212) are highlighted with black circles. B) Colored points indicate cells expressing *tlr4bb* (green), *tlr4al* (magenta), or *tlr4ba* (orange); gray points and circles are identical to panel A. C) Enlarged views of clusters c212 and c71, separated by gene of interest. This includes the genes shown in panels A and B, as well the macrophage marker, *mpeg1.1* (light blue) (26, 51). The number in the bottom left of each table entry is the expression level of the gene within the cluster divided by its expression level in all other cells in the dataset. If there was no expression in cells outside the cluster, expression within the cluster was divided by the detection threshold (0.001) giving a minimum estimate for the enrichment. The background cells are now colored by the developmental stage from which the cell was isolated: 1 dpf (white), 2 dpf (light gray), or 5 dpf (dark gray). The dashed lines in shown on c71 are approximate divisions between the age-dependent sub-clusters of c71.

348 We found that *ly96* is expressed in two clusters, denoted “c71” and “c212” (Fig 3A,  
349 yellow points). Both of these clusters are annotated in the Atlas as putative macrophage cells

350 based on their transcription profiles (44). *ly96* is highly enriched in these clusters relative to other  
351 clusters. This can be measured by taking the ratio of the average expression level of *ly96* for the  
352 cells in the cluster relative to the average expression level of *ly96* in all other cells. This ratio is  
353 235 for cluster c212 and  $\geq 173$  for cluster c71, indicating that *ly96* is highly enriched in these  
354 clusters. For comparison, the well-established macrophage marker *mpeg1.1* (26, 51) has ratios of  
355 102 and 202, respectively, for these same clusters (Fig 3C).

356 We next investigated the expression of the *tlr4bb*, *tlr4al*, and *tlr4ba* genes. We found that  
357 *tlr4bb* and *tlr4al* had quite limited expression patterns (Fig 3B, green and pink), while *tlr4ba* was  
358 expressed broadly (Fig 3B, orange). All three *tlr4* genes were found in cluster c212, but only  
359 *tlr4bb* was found in cluster c71 (Fig 3C).

360 The Atlas also has the potential to reveal time-course information for the expression of  
361 these genes, as it contains cells isolated from fish at 1, 2 and 5 dpf. We therefore shaded the cells  
362 within clusters c71 and c212 by their developmental time point (Fig 3C). Cluster c212, where we  
363 observed overlapping expression for *ly96* and all three *tlr4* genes, consists entirely of cells  
364 isolated from 5 dpf zebrafish (Fig 3C). Cluster c71 has three discrete sub-clusters corresponding  
365 to the age of the fish from which the cell was extracted. We see no *ly96* in the 1 dpf sub-cluster,  
366 a small amount in the 2 dpf sub-cluster, and the highest level in the 5 dpf sub-cluster (Fig 3C).  
367 Likewise, *tlr4bb* is expressed in the 5 dpf sub-cluster but no others. For comparison, the  
368 macrophage marker *mpeg1.1* is found in all cells within c71 and c212, regardless of the age of  
369 the fish from which the cell was extracted.

370 These observations suggest that *ly96* and all three *tlr4* genes are expressed together in a  
371 subset of macrophage cells by 5 dpf (Fig 3C, c212). Samples of later time points would be

372 necessary to establish if these genes are at their full expression level by 5 dpf, or if their  
373 expression level and cell-type specificity continues to change as the fish develop.

374

### 375 **Zebrafish Tlr4a/Md-2 can activate NF- $\kappa$ B in response to lipopolysaccharide**

376         Given the low sequence similarity between the zebrafish Md-2 protein and its amniote  
377 orthologs, it was not clear that the zebrafish Md-2 would be capable of mediating the Tlr4  
378 response to Md-2. We therefore turned to an *ex vivo* cell culture assay to assess the ability of the  
379 zebrafish Md-2 to partner with zebrafish Tlr4a and Tlr4b for LPS activation. In this assay, we co-  
380 transfected genes encoding complex components into HEK293T cells and then used luciferase to  
381 quantify NF- $\kappa$ B output in response to exogenously applied LPS (6).

382         We started by co-transfecting cells with zebrafish *ly96* and zebrafish *tlr4ba* or *tlr4bb* and  
383 then measuring NF- $\kappa$ B activation in response to exogenously applied LPS. We saw no activation  
384 (Fig 4A). This result was unsurprising, as this experiment attempted to activate a Tlr4/Md-2  
385 complex without Cd14—an important peripheral protein that brings LPS to Tlr4/Md-2  
386 complexes in amniotes, dramatically increasing the NF- $\kappa$ B response (Fig 1) (52–56). We thus  
387 co-transfected *tlr4ba* or *tlr4bb* with zebrafish *ly96* and human *cd14*. In this context, we observed  
388 potent activation of NF- $\kappa$ B in response to LPS for *tlr4ba*, but not *tlr4bb* (Fig 4A). To verify that  
389 the activation of Tlr4a required Md-2, rather than merely Cd14, we tested the activation of Tlr4  
390 and Cd14 without transfecting *ly96*—this complex did not respond to LPS (Fig 4A). We then  
391 verified that the zebrafish Tlr4a/Md-2 complex, complemented with human Cd14, exhibited a  
392 dose-dependent response to LPS (Fig 4B). The concentration of LPS needed for activation of the  
393 zebrafish Tlr4a/Md-2 complex was much higher than that needed for activation of the human  
394 proteins in these cells, but consistent with what has been observed for other species (57).

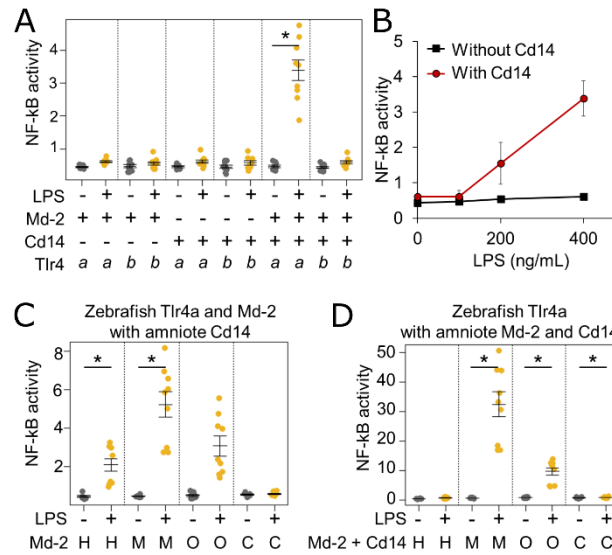

395  
396  
397  
398  
399  
400  
401  
402  
403  
404  
405  
406

**Fig 4. LPS activates the zebrafish Tlr4a/Md-2 in a functional assay.** A) Activation of zebrafish Tlr4a and Tlr4b in the presence and absence of zebrafish Md-2 and human CD14. Points are the technical replicates from three biological replicates. Bold lines are the mean of the biological replicates. Error bars are a standard error on the mean of the biological replicates. B) Dose-dependence of LPS response by zebrafish Tlr4a/Md-2 in the presence (red) and absence (black) of human CD14. C) Zebrafish Tlr4a/Md-2 complemented with Cd14 proteins from amniotes. D) Zebrafish Tlr4a complemented with species-matched Md-2/Cd14 pairs taken from amniotes. Statistically significant differences (single-tailed Student's t-test) are noted on each panel (\*  $p < 0.05$ )

407  
408  
409  
410  
411  
412  
413  
414  
415  
416

Our results support the hypothesis that zebrafish Tlr4a/Md-2 can activate in response to LPS; however, this could only be done with the presence of a supporting mammalian protein (human Cd14). To determine if this was an artifact of the human protein, we tested the LPS activation of Tlr4a/Md-2 in the presence of human, mouse, opossum, and chicken Cd14. We found that all but the chicken Cd14 were able to support the activation of the complex (Fig 4C). Thus, the activity of the zebrafish Tlr4a/Md-2 complex does not depend exclusively on human Cd14 but can instead be supported by diverse Cd14 molecules. Given the importance of Cd14 in this assay, we looked for evidence of a zebrafish *cd14* gene; however, we were unable to locate such a gene. The inability to detect a *cd14* in fish may be due to rapid evolution of this gene since the most recent common ancestor, or, alternatively, Cd14 may have arisen as a supporting

417 molecule for LPS-recognition after the divergence of tetrapods. The requirement for Cd14 in  
418 these experiments could be a problem with the heterologous cell line (these experiments were  
419 done in human cells) or a missing alternate secondary cofactor (such as a fish LPS binding  
420 protein).

421 Finally, to see if zebrafish Tlr4a behaved similarly to amniote Tlr4, we investigated  
422 whether Md-2 from other species could act in concert with zebrafish Tlr4a. We co-transfected  
423 *tlr4a* with human, mouse, or opossum *ly96* genes. We saw complementation by both mouse and  
424 opossum Md-2 for LPS activation of zebrafish Tlr4a (Fig 4D). This suggests that the  
425 requirements for activation by the Tlr4/Md-2 complex have been conserved for over 400 million  
426 years and are shared across bony vertebrates.

427

#### 428 **Md-2 is not required for LPS-induced death in 5 dpf larval zebrafish**

429 We next probed the physiological role of Md-2 in LPS-induced septic shock in larval 5  
430 dpf zebrafish. We first treated 5 dpf larval WT zebrafish with LPS and followed their survival  
431 over time. No treated WT fish survived more than 48 hours; the median survival time was 30 hrs  
432 (Fig 5A). As a control, we also tested the LPS response for *myd88*<sup>-/-</sup> fish. As has been observed  
433 previously (22), these showed a modest but significant increase in survival (Fig 5A). This was  
434 consistent with LPS inducing a response that depends in part on a *myd88* dependent pathway.

435 To test the role of Md-2 in this response, we used CRISPR-Cas9-based mutagenesis to  
436 establish three independent zebrafish lines with mutations in the first exon of the *ly96* gene. The  
437 mutations were expected to induce a loss of function through removal of the start codon (*ly96*<sup>A/A</sup>)  
438 or through a frame shift and premature stop codon (*ly96*<sup>B/B</sup> and *ly96*<sup>C/C</sup>) (Table S2). Using RT-  
439 PCR primers downstream of the targeted region, we demonstrated that *ly96* mRNA is expressed  
440 in mutant larval zebrafish (Fig 5E).

441 We then tested the three *ly96* mutant zebrafish lines for their susceptibility to LPS-  
442 induced septic shock. The results were mixed. Compared to matched WT controls, *ly96<sup>A/A</sup>*  
443 zebrafish survived for slightly longer (Fig 5B); *ly96<sup>B/B</sup>* zebrafish survived similarly (Fig 5C), and  
444 *ly96<sup>C/C</sup>* zebrafish survived shorter (Fig 5D). This is consistent with some other pathway rather  
445 than Tlr4/Md-2 being the primary route for LPS-induced death in larval zebrafish.

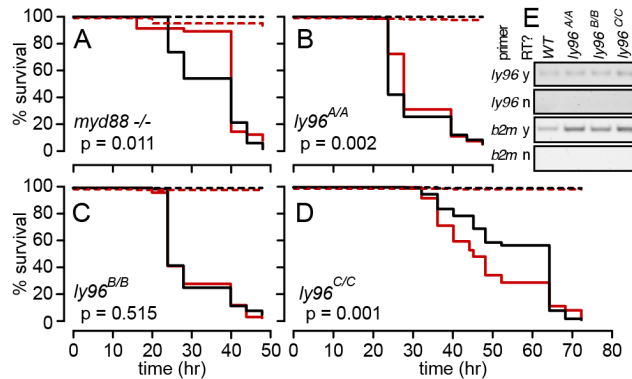

446  
447  
448 **Fig 5. *ly96* mutations only moderately affect LPS survival in larval zebrafish.** A-D) Curves  
449 show survival of wildtype (black) and mutant (red) zebrafish in the presence of 0.6 mg/mL LPS  
450 (solid line) or mock treatment (dashed line). The genotype is indicated on each panel. The p-  
451 value was determined by comparing the matched survival curves by a log-rank Mantel-Cox test.  
452 The experiments shown in panels A-C were performed in parallel, while the experiments in  
453 panel D were performed at a later date with an LPS lot that showed lower potency, necessitating  
454 a longer treatment time. Panels A-D represent averages of one, five, five, and three experimental  
455 repeats, respectively. Panel E shows mRNA transcript level for each mutant zebrafish. Rows use  
456 different primers (*ly96* or *b2m*) with and without reverse transcriptase (RT). Columns show fish  
457 genotype.  
458

#### 459 **The zebrafish *tlr4* paralog arose after the evolution of *ly96***

460 Finally, we revisited the idea that the evolutionary history of zebrafish *tlr4* genes implies  
461 that they do not act as LPS-sensing molecules. Previous authors suggested that an ancestral *TLR*  
462 gene duplicated in the ancestor of bony vertebrates (~450 million years ago), and that the two  
463 paralogs were then differentially lost on the mammalian and bony fish lineages (21),  
464 respectively. This early divergence, before the evolution of *ly96*, may suggest very different  
465 functional roles for mammalian versus fish *tlr4*s.

466 We set out to better resolve when the zebrafish *tlr4* paralog arose relative to its  
467 mammalian counterparts, particularly with regard to the evolution of *ly96*. As with our analysis  
468 of Md-2, we started with a phylogenetic tree and then turned to synteny. For the phylogenetic  
469 tree, we constructed a multiple sequence alignment containing 263 Tlr4 sequences and 190  
470 Cd180 protein sequences as an outgroup. (Cd180 is the most closely related paralog to Tlr4)  
471 (58). The alignment is available in File S2. In the resulting maximum likelihood tree, Tlr4 and  
472 Cd180 form distinct, well-supported clades (Fig 6A). Within the Tlr4 clade, zebrafish Tlr4a and  
473 Tlr4b are part of a monophyletic group with other Tlr4s.

474 We next investigated the genomic context for *tlr4* genes in eleven genomes, each with a  
475 complete chromosome assembly (Table S3). We selected a set of 22 genes flanking human *tlr4*  
476 and a set of 22 genes flanking the three zebrafish *tlr4* genes (Table S4). Notably, there were no  
477 shared homologs between the sets, demonstrating the radical difference between the genomic  
478 contexts of human and zebrafish *tlr4*. We then used these sets of genes to BLAST each of the  
479 eleven genomes and calculated a running average for the BLAST e-values along each  
480 chromosome. This allowed us to assess the overall similarity of genomic regions to either the  
481 human or zebrafish *tlr4* context. Fig 6B-G shows representative traces for six chromosomes  
482 taken from five species, with results for all genomes in Fig S2-S13. We were able to distinguish  
483 two distinct contexts for *tlr4* genes. In some organisms—human and frog, for example—*tlr4* is  
484 surrounded by hits from the human gene set (Fig 6B and D). In other organisms—zebrafish and  
485 pike, for example—*tlr4* is surrounded by hits from the zebrafish gene set (Fig 6C and E).

486 To place our results in their evolutionary context, we plotted our BLAST output against  
487 the phylogeny for our chosen species. For each species, we displayed the chromosome with the  
488 most hits from the human set (Fig 6H) and the chromosome with the most hits from the zebrafish

489 set (Fig 6I). We made an exception for the pike, displaying the chromosome with the *tlr4* gene  
490 (linkage group 5), not the chromosome with the most zebrafish hits (linkage group 6). We  
491 indicated whether a gene from the human or zebrafish set was seen somewhere on that  
492 chromosome by coloring the square corresponding to that gene.

493 Four species had *tlr4* in a human-like context: human, chicken, frog and gar. None of  
494 these species—including the gar—had a duplicate copy of *tlr4* in a zebrafish-like context. The  
495 human-like context of the gar gene is shown Fig 6F, while the lack of *tlr4* in the most zebrafish-  
496 like region of the gar genome is shown in Fig 6G. The remainder of the ray-finned fishes had *tlr4*  
497 in either a zebrafish-like context (catfish, zebrafish, and pike) or had no *tlr4* gene at all  
498 (bonytongue, cod, and puffer).

499 The most parsimonious history consistent with the observed distribution across genomes  
500 is shown in Fig 6J. In this scenario, *tlr4* arose in a genomic context similar to the one preserved  
501 in humans. This occurred after the divergence of bony and cartilaginous fishes (~475 million  
502 years ago), but before the divergence of ray-finned and lobe-finned fishes (~430 million years  
503 ago). The ancestral genomic context was preserved in tetrapods, including humans. It was also  
504 maintained in the ray-finned fishes for ~130 million years, as indicated by the location of the *tlr4*  
505 gene in the gar genome. Then, sometime between 300 and 250 million years ago, the *tlr4* gene  
506 was both duplicated into the genomic context observed in zebrafish, as well as lost from the  
507 ancestral context. Finally, between 150 and 100 million years ago, a tandem duplication occurred  
508 within the *Cypriniformes* fishes, leading to the tandem copies of *tlr4* observed in zebrafish, carp,  
509 and other *Cypriniformes* fishes.

510

511



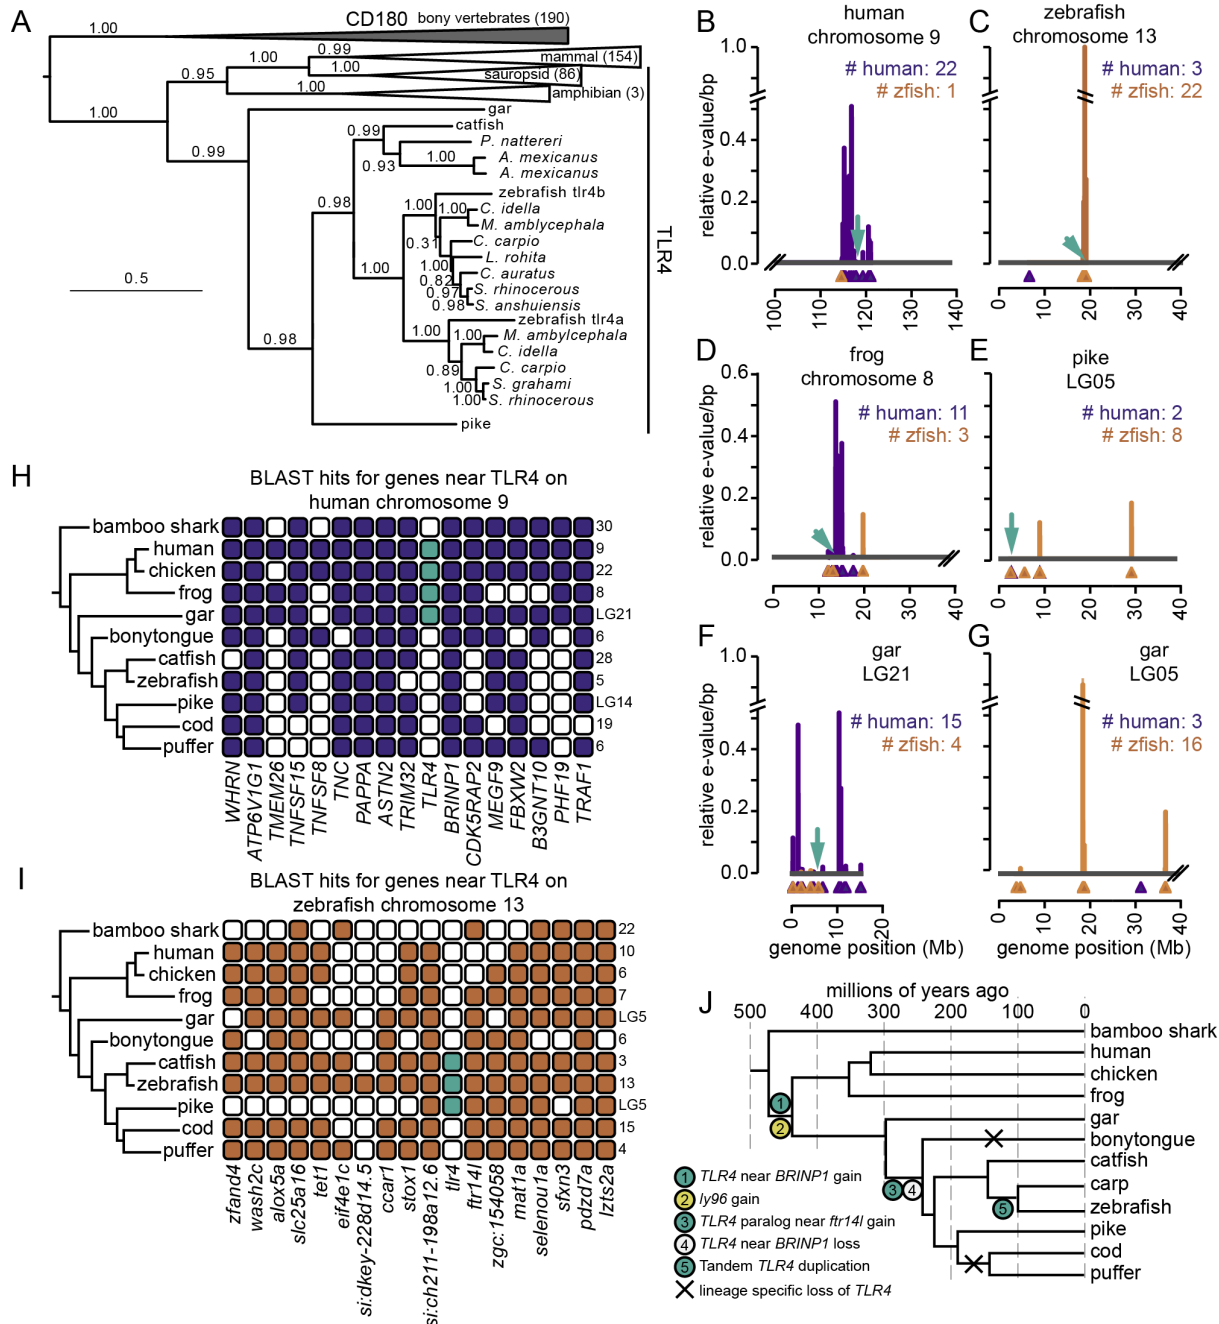

512  
513  
514  
515  
516  
517  
518  
519  
520  
521  
522

**Fig 6. Zebrafish *trl4* paralogs evolved within the ray-finned fishes.** A) Maximum likelihood phylogeny for 453 Tlr4 and Cd180 protein sequences. SH supports are indicated on the tree. Wedges are clades, with the length indicating the maximum branch length from the ancestor of the clade. The taxonomic distribution and number of genes within each wedge are indicated on the plot. B-G) Hits for human (purple) and zebrafish (orange) gene sets on six representative chromosomes taken from five species. The species and chromosome are indicated at the top of each plot. The x-axis denotes position on the chromosome. Triangles indicate gene start positions. The green arrow indicates the location of a Tlr4 gene. The y-axis is a running average of the BLAST e-value for each gene set along the genome (see methods). The numbers on the plot indicate the number of human and zebrafish hits within the region shown. H, I) Each row

523 shows the chromosome with the most BLAST hits from the human (panel H) or zebrafish (panel  
524 I) gene set. Columns indicate specific genes from the set, with names denoted below. A colored  
525 square indicates a gene found somewhere on the chromosome. A green square is a *tlr4* gene. The  
526 species tree is shown on the left; the chromosome number is on the right. J) Schematic  
527 representation of a plausible scenario for the history of the *tlr4* gene. Times are taken from  
528 Hughes et al. (59) and timetree.org (60).  
529

530 This revised evolutionary history places the evolution of the zebrafish *tlr4* paralogs much  
531 later than was previously hypothesized (21). Importantly, the duplication of TLR4 occurred *after*  
532 the evolution of Md-2, meaning that the formation of the Tlr4/Md-2 complex likely pre-dates the  
533 duplication event. Thus, the interaction with Md-2 and the ability to activate with LPS were an  
534 ancestral feature of zebrafish Tlr4 rather than something that could only be gained in parallel  
535 along the tetrapod and bony fish lineages.

536

## 537 **DISCUSSION**

538 Our observations led us to reevaluate the decade-old idea that Tlr4 does not participate in  
539 the LPS-induced inflammatory response in zebrafish. We have identified the zebrafish gene  
540 encoding the Tlr4 co-receptor Md-2 (*ly96*). The gene, like *tlr4ba* and *tlr4bb*, is transcribed in  
541 zebrafish cells that transcribe a collection of macrophage genes. In concert with zebrafish Tlr4a,  
542 zebrafish Md-2 is capable of activating NF- $\kappa$ B signaling in an *ex vivo* functional assay. Finally, a  
543 careful phylogenetic analysis suggests that the mammalian and zebrafish *tlr4* genes are not as  
544 evolutionarily distinct as previously thought. While not direct orthologs, the zebrafish paralogs  
545 evolved well after *ly96* and likely preserve an ancestral LPS recognition activity.

546 Our work demonstrates that, given the correct context, zebrafish Tlr4a and Md-2 form a  
547 functional complex that recognizes LPS and activates NF- $\kappa$ B signaling. Further, the molecular  
548 basis for the interaction between the partners appears to have been conserved for the last 450  
549 million years - zebrafish Tlr4a is compatible with mouse and opossum Md-2 (Fig 4D). This is

550 despite the fact that the orthologous proteins from each species have only ~20% identity at the  
551 amino acid sequence level. The simplest explanation for this observation is that the ability of  
552 Tlr4/Md-2 to activate in response to LPS is an ancestral feature of the protein complex that has  
553 been conserved across the bony vertebrates—from mammals to bony fishes.

554 We have not shown, however, that LPS-induced Tlr4/Md-2 signaling actually occurs in  
555 zebrafish. Our two attempts to do so—our cell culture functional assay and analysis of zebrafish  
556 *ly96* loss of function mutants—both gave mixed results. We will discuss each in turn.

557

### 558 **LPS activation of Tlr4a/Md-2 in human cells requires supporting molecules**

559 In our functional assays, we had to add a mammalian Cd14 to activate NF- $\kappa$ B signaling  
560 through zebrafish Tlr4a/Md-2 (Fig 4C). In amniotes, Cd14 delivers LPS directly to Md-2 (Fig 1).  
561 We could find no ortholog to *cd14* in the zebrafish genome.

562 One possibility is that the human cell line used for the functional assays is missing some  
563 critical component for the delivery of LPS and assembly of the active dimer. Tlr4, Md-2, and  
564 Cd14 are the necessary and sufficient set of amniote proteins that confer an LPS-dependent NF-  
565  $\kappa$ B response in HEK293T cells. It could be that some other non-homologous protein plays the  
566 role of Cd14 in zebrafish.

567 Another possibility is that LPS is not a zebrafish Tlr4a/Md-2 agonist *in vivo*. We showed  
568 that we can activate the complex in a human cell line given an appropriate delivery molecule and  
569 a high enough LPS concentration. But, under physiological conditions, the Tlr4a/Md-2 complex  
570 could respond to some other chemically similar ligand. This would not be surprising: changes in  
571 ligand specificity have been observed across Md-2 in the amniotes (61). There is also some  
572 evidence that zebrafish Tlr4a may be antagonized by LPS *in vivo* (20). This would be compatible

573 with another ligand activating the complex and LPS competing and activating at a lower level  
574 than can be achieved by the native ligand.

575 Finally, our observation that Tlr4a activates NF- $\kappa$ B with both mouse and opossum Md-2  
576 directly contrasts previous work that showed the complex could not activate (Fig 4C) (20, 21).  
577 The key difference between our experiments and those done previously is the sequence of *tlr4a*  
578 used. Previous investigators used a construct that was ~75 amino acids shorter than tetrapod  
579 Tlr4s. This construct is missing both the signal peptide required to target Tlr4a to the cell surface  
580 and a region of the protein that is likely critical for Md-2 binding (Fig S13). In contrast, we used  
581 a full-length ORF (ENSDART00000044697.6, GRCz10). The difference in our constructs arises  
582 because the previous analysis relied on cDNA that, apparently, captured an alternate splice  
583 variant of *tlr4a*.

584

### 585 **Multiple pathways contribute to LPS-induced death in larval zebrafish**

586 Larval zebrafish *ly96* loss of function mutants did not exhibit appreciably altered death  
587 rates upon exposure to LPS compared to WT (Fig 5B-D). This is consistent with a previous  
588 morpholino study that knocked down *tlr4a* and observed no change in sensitivity to LPS (20).  
589 This contrasts with mice, however, where knockout of *LY96* is protective against endotoxic  
590 shock (4) and disruption or knockout of *Tlr4* leads to hypo-responsiveness to LPS (1, 62).

591 We cannot rule out the possibility that this lack of response is due to an experimental  
592 artifact. First, zebrafish may have retained a second copy of the *ly96* gene from the teleost  
593 genome duplication that maintained function even after deletion of the targeted copy. We were  
594 unable find any evidence of such a gene; however, the challenge of finding the original *ly96* gene  
595 means that we cannot rule this out. A second possibility is that the mutants that we generated

596 may not represent a complete loss of function. For example, use of a potential alternative start  
597 codon 17 amino acids downstream of the normal start codon could produce a truncated protein  
598 (*ly96<sup>ΔA</sup>*). Although this would be missing N-terminal amino acids that are known to be critical  
599 for Md-2 function in other systems (Table S2), these amino acids may not be necessary in  
600 zebrafish. Finally, we tested a single developmental time point. It could be that Tlr4a/Md-2,  
601 while expressed in larvae (Fig 3C), is not yet a large player in LPS sensing. Further experiments  
602 on zebrafish at different time points may help clarify this point.

603 Another challenge is that LPS-mediated death is a relatively blunt instrument to test for  
604 the activity of the Tlr4/Md-2 complex. We observed that addition of LPS dramatically increased  
605 death rate (Fig 5A), even in a *myd88<sup>-/-</sup>* background. This indicates that at least one other non-  
606 Toll-like pathway contributes to LPS-induced. One possibility is that this occurs by intracellular  
607 sensing of LPS via caspases and inflammasomes (63). Various studies have shown  
608 inflammasome signaling to be widespread in zebrafish larvae (64) and Il-1r to be required to  
609 prevent cell death in response to infection in multiple cells (65). Intracellular sensing may be  
610 much more important in fish than mammals: zebrafish have 385 of these putative intracellular  
611 sensors whereas humans have 22 (66).

612 As a result of such alternate pathways, even if the Tlr4a/Md-2 complex contributes to the  
613 LPS-induced inflammatory response, removing it might not lead to a measurable difference in  
614 death rate. Compounding this difficulty, our expression analysis revealed that zebrafish *ly96* is  
615 much more restricted in its expression than the corresponding mammalian genes (27). There  
616 may, in fact, be specific subtypes of macrophages that express *ly96* and *tlr4s*—and are defective  
617 in LPS sensing in the *ly96* mutants—but remain invisible at the level of LPS-induced death.  
618 Higher-resolution studies of LPS-induced inflammation will be required to sort this out.

619

## 620 **Snapshot in the evolutionary history of this complex**

621           The presence of Md-2 in zebrafish indicates that both Tlr4 and Md-2 existed, together, in  
622 the last common ancestor of bony vertebrates. Because descendants along both the tetrapod and  
623 ray-finned fish lineages activate with LPS, the ability to respond to LPS is likely an ancestral  
624 function that has been conserved for 435 million years.

625           That said, these proteins have evolved significantly since this shared ancestor. Along the  
626 tetrapod lineage, a supporting collection of proteins evolved. Cd14 arose through a duplication  
627 within the Toll-like receptor family and is now an essential component of the Tlr4/Md-2  
628 complex, delivering LPS to Md-2 in a coordinated fashion (53, 54). Tetrapods also acquired  
629 Lipid Binding Protein (LBP), improving LPS delivery (52, 67). Amniotes then further adjusted  
630 the Tlr4/Md-2 pro-inflammatory response through addition of amniote-specific Damage-  
631 Associated Molecular Pattern (DAMP) molecules such as S100A9 (68), which amplify LPS-  
632 induced inflammation (69). All the while, mutations to Md-2 changed its specificity for LPS and  
633 its chemical analogs (70). For example, humans acquired unique lipid IVa antagonism sometime  
634 after the divergence of humans and mice (71, 72).

635           The changes that occurred along the ray-finned fish lineages are not yet clear. Did they  
636 acquire supporting LPS delivery molecules analogous to Cd14? Has the specificity of Md-2  
637 fluctuated in ray-finned fishes as it has along the tetrapod lineage? Further work is needed to  
638 answer these questions.

639           We hypothesize, however, that ray-finned fishes maintain an ancestral, low-sensitivity  
640 Tlr4/Md-2 LPS sensing complex. Fish have previously been shown to be relatively resistant to  
641 septic shock (73, 74), with high concentrations of LPS needed to activate teleost leukocytes (25,

642 75–77). This parallels the observation that early diverging tetrapods, such as amphibians, also  
643 require high doses of LPS to trigger an inflammatory response (78). This could be explained if  
644 ray-finned fishes do not have specialized machinery to deliver LPS to the complex, but instead  
645 use Tlr4/Md-2 as a simple LPS sensor. Other observations consistent with a relatively primitive  
646 Tlr4/Md-2 LPS response in zebrafish are the fact that Tlr4 was lost, independently, along  
647 multiple fish lineages (20, 21, 73) (Fig 6J), as well as the existence of parallel LPS sensing  
648 pathways in zebrafish (64). If the Tlr4/Md-2 complex is peripheral to the LPS response in ray-  
649 finned fishes, it could be lost with minimal fitness consequences. In contrast, Tlr4/Md-2 became  
650 progressively more central to the LPS response along the mammalian lineage—and as a result  
651 has been highly conserved.

652 Our work suggests that we should re-visit our understanding of LPS signaling through  
653 Tlr4/Md-2 in zebrafish. We hypothesize that zebrafish preserve an ancestral, low-sensitivity  
654 Tlr4/Md-2 complex. In contrast to mammals—in which the Tlr4/Md-2 complex is the primary  
655 LPS receptor—the zebrafish Tlr4/Md-2 complex acts in parallel with several LPS-sensitive  
656 pathways, likely playing roles in a small population of innate immune cells.

657

## 658 **ACKNOWLEDGMENTS**

659 We thank Kristi Hamilton and Lila Kaye for assistance with zebrafish LPS survival assays, and  
660 Rose Sockol and the University of Oregon Aquatic Animal Care Services staff for fish  
661 husbandry. We thank Prof. Carol Kim for sharing the *tlr4bb* plasmid.

662

663

## 664 **REFERENCES**

- 665 1. Poltorak, A. 1998. Defective LPS Signaling in C3H/HeJ and C57BL/10ScCr Mice: Mutations  
666 in Tlr4 Gene. *Science (80-. )*. 282: 2085–2088.
- 667 2. Schletter, J., H. Heine, A. J. Ulmer, and E. T. Rietschel. 1995. Molecular mechanisms of  
668 endotoxin activity. *Arch. Microbiol.* 164: 383–389.
- 669 3. Ulevitch, R. J., and P. S. Tobias. 1995. Receptor-Dependent Mechanisms of Cell Stimulation  
670 by Bacterial Endotoxin. *Annu. Rev. Immunol.* 13: 437–457.
- 671 4. Nagai, Y., S. Akashi, M. Nagafuku, M. Ogata, Y. Iwakura, S. Akira, T. Kitamura, A. Kosugi,  
672 M. Kimoto, and K. Miyake. 2002. Essential role of MD-2 in LPS responsiveness and TLR4  
673 distribution. *Nat. Immunol.* 3: 667.
- 674 5. Park, B. S., and J.-O. Lee. 2013. Recognition of lipopolysaccharide pattern by TLR4  
675 complexes. *Exp. Mol. Med.* 45: e66.
- 676 6. Chow, J. C., D. W. Young, D. T. Golenbock, W. J. Christ, and F. Gusovsky. 1999. Toll-like  
677 receptor-4 mediates lipopolysaccharide-induced signal transduction. *J. Biol. Chem.* 274: 10689–  
678 92.
- 679 7. Yiu, J. H. C., B. Dorweiler, and C. W. Woo. 2017. Interaction between gut microbiota and  
680 toll-like receptor: from immunity to metabolism. *J. Mol. Med. (Berl)*. 95: 13–20.
- 681 8. Fan, J., and A. B. Malik. 2003. Toll-like receptor-4 (TLR4) signaling augments chemokine-  
682 induced neutrophil migration by modulating cell surface expression of chemokine receptors. *Nat.*  
683 *Med.* 9: 315–321.
- 684 9. Murad, S. 2014. Toll-Like Receptor 4 in Inflammation and Angiogenesis: A Double-Edged  
685 Sword. *Front. Immunol.* 5: 313.



- 686 10. Leon, C. G., R. Tory, J. Jia, O. Sivak, and K. M. Wasan. 2008. Discovery and development  
687 of toll-like receptor 4 (TLR4) antagonists: a new paradigm for treating sepsis and other diseases.  
688 *Pharm. Res.* 25: 1751–61.
- 689 11. Kuzmich, N. N., K. V Sivak, V. N. Chubarev, Y. B. Porozov, T. N. Savateeva-Lyubimova,  
690 and F. Peri. 2017. TLR4 Signaling Pathway Modulators as Potential Therapeutics in  
691 Inflammation and Sepsis. *Vaccines* 5.
- 692 12. Zettel, K., S. Korff, R. Zamora, A. E. Morelli, S. Darwiche, P. A. Loughran, G. Elson, L.  
693 Shang, S. Salgado-Pires, M. J. Scott, Y. Vodovotz, and T. R. Billiar. 2017. Toll-Like Receptor 4  
694 on both Myeloid Cells and Dendritic Cells Is Required for Systemic Inflammation and Organ  
695 Damage after Hemorrhagic Shock with Tissue Trauma in Mice. *Front. Immunol.* 8: 1672.
- 696 13. Gruffaz, M., K. Vasan, B. Tan, S. Ramos da Silva, and S.-J. Gao. 2017. TLR4-Mediated  
697 Inflammation Promotes KSHV-Induced Cellular Transformation and Tumorigenesis by  
698 Activating the STAT3 Pathway. *Cancer Res.* 77: 7094–7108.
- 699 14. Koliaraki, V., N. Chalkidi, A. Henriques, C. Tzaferis, A. Polykratis, A. Waisman, W. Muller,  
700 D. J. Hackam, M. Pasparakis, and G. Kollias. 2019. Innate Sensing through Mesenchymal  
701 TLR4/MyD88 Signals Promotes Spontaneous Intestinal Tumorigenesis. *Cell Rep.* 26: 536–  
702 545.e4.
- 703 15. Yoder, J. A., M. E. Nielsen, C. T. Amemiya, and G. W. Litman. 2002. Zebrafish as an  
704 immunological model system. *Microbes Infect.* 4: 1469–1478.
- 705 16. Renshaw, S. A., and N. S. Trede. 2012. A model 450 million years in the making: zebrafish  
706 and vertebrate immunity. *Dis. Model. Mech.* 5: 38–47.

- 707 17. Hall, C., M. V. Flores, A. Chien, A. Davidson, K. Crosier, and P. Crosier. 2009. Transgenic  
708 zebrafish reporter lines reveal conserved Toll-like receptor signaling potential in embryonic  
709 myeloid leukocytes and adult immune cell lineages. *J. Leukoc. Biol.* 85: 751–765.
- 710 18. Burns, A. R., and K. Guillemin. 2017. The scales of the zebrafish: host-microbiota  
711 interactions from proteins to populations. *Curr. Opin. Microbiol.* 38: 137–141.
- 712 19. Park, B. S., D. H. Song, H. M. Kim, B.-S. Choi, H. Lee, and J.-O. Lee. 2009. The structural  
713 basis of lipopolysaccharide recognition by the TLR4–MD-2 complex. *Nature* 458: 1191–1195.
- 714 20. Sepulcre, M. P., F. Alcaraz-Pérez, A. López-Muñoz, F. J. Roca, J. Meseguer, M. L. Cayuela,  
715 and V. Mulero. 2009. Evolution of lipopolysaccharide (LPS) recognition and signaling: fish  
716 TLR4 does not recognize LPS and negatively regulates NF-kappaB activation. *J. Immunol.* 182:  
717 1836–45.
- 718 21. Sullivan, C., J. Charette, J. Catchen, C. R. Lage, G. Giasson, J. H. Postlethwait, P. J. Millard,  
719 and C. H. Kim. 2009. The Gene History of Zebrafish tlr4a and tlr4b Is Predictive of Their  
720 Divergent Functions. *J. Immunol.* 183: 5896–5908.
- 721 22. Bates, J. M., J. Akerlund, E. Mittge, and K. Guillemin. 2007. Intestinal Alkaline Phosphatase  
722 Detoxifies Lipopolysaccharide and Prevents Inflammation in Zebrafish in Response to the Gut  
723 Microbiota. *Cell Host Microbe* 2: 371–382.
- 724 23. van der Sar, A. M., O. W. Stockhammer, C. van der Laan, H. P. Spaank, W. Bitter, and A. H.  
725 Meijer. 2006. MyD88 innate immune function in a zebrafish embryo infection model. *Infect.*  
726 *Immun.* 74: 2436–41.
- 727 24. Forn-Cuní, G., M. Varela, P. Pereiro, B. Novoa, and A. Figueras. 2017. Conserved gene

- 728 regulation during acute inflammation between zebrafish and mammals. *Sci. Rep.* 7: 41905.
- 729 25. Sepulcre, M. P., G. López-Castejón, J. Meseguer, and V. Mulero. 2007. The activation of  
730 gilthead seabream professional phagocytes by different PAMPs underlines the behavioural  
731 diversity of the main innate immune cells of bony fish. *Mol. Immunol.* 44: 2009–2016.
- 732 26. Ellett, F., L. Pase, J. W. Hayman, A. Andrianopoulos, and G. J. Lieschke. 2011. mpeg1  
733 promoter transgenes direct macrophage-lineage expression in zebrafish. *Blood* 117: e49–e56.
- 734 27. Vaure, C., and Y. Liu. 2014. A Comparative Review of Toll-Like Receptor 4 Expression and  
735 Functionality in Different Animal Species. *Front. Immunol.* 5: 316.
- 736 28. Lu, Y.-C., W.-C. Yeh, and P. S. Ohashi. 2008. LPS/TLR4 signal transduction pathway.  
737 *Cytokine* 42: 145–151.
- 738 29. Kimoto, M., K. Nagasawa, and K. Miyake. 2003. Role of TLR4/MD-2 and RP105/MD-1 in  
739 Innate Recognition of Lipopolysaccharide. *Scand. J. Infect. Dis.* 35: 568–572.
- 740 30. Qiao, L., W. Yang, J. Fu, and Z. Song. 2013. Transcriptome Profile of the Green Odorous  
741 Frog (*Odorrana margaretae*). *PLoS One* 8: e75211.
- 742 31. Matsunami, M., J. Kitano, O. Kishida, H. Michimae, T. Miura, and K. Nishimura. 2015.  
743 Transcriptome analysis of predator- and prey-induced phenotypic plasticity in the Hokkaido  
744 salamander (*Hynobius retardatus*). *Mol. Ecol.* 24: 3064–3076.
- 745 32. Nourisson, C., M. Carneiro, M. Vallinoto, and F. Sequeira. 2014. De novo transcriptome  
746 assembly and polymorphism detection in ecologically important widely distributed Neotropical  
747 toads from the *Rhinella marina* species complex (Anura: Bufonidae). *Genomic Resour. Notes*  
748 *Accept. 1 August 2014-30 Sept. 2014*.

- 749 33. Genomic Resources Development Consortium, W. Arthofer, B. L. Banbury, M. Carneiro, F.  
750 Cicconardi, T. F. Duda, R. B. Harris, D. S. Kang, A. D. Leaché, V. Nolte, C. Nourisson, N.  
751 Palmieri, B. C. Schlick-Steiner, C. Schlötterer, F. Sequeira, C. Sim, F. M. Steiner, M. Vallinoto,  
752 and D. A. Weese. 2015. Genomic Resources Notes Accepted 1 August 2014-30 September 2014.  
753 *Mol. Ecol. Resour.* 15: 228–229.
- 754 34. Liu, Y., B. Schmidt, and D. L. Maskell. 2010. MSAProbs: multiple sequence alignment  
755 based on pair hidden Markov models and partition function posterior probabilities.  
756 *Bioinformatics* 26: 1958–1964.
- 757 35. Tamura, K., G. Stecher, D. Peterson, A. Filip ski, and S. Kumar. 2013. MEGA6: Molecular  
758 Evolutionary Genetics Analysis Version 6.0. *Mol. Biol. Evol.* 30: 2725–2729.
- 759 36. Guindon, S., J. F. Dufayard, V. Lefort, M. Anisimova, W. Hordijk, and O. Gascuel. 2010.  
760 New Algorithms and Methods to Estimate Maximum-Likelihood Phylogenies: Assessing the  
761 Performance of PhyML 3.0. *Syst. Biol.* 59: 307–321.
- 762 37. Le, S. Q., and O. Gascuel. 2010. Accounting for Solvent Accessibility and Secondary  
763 Structure in Protein Phylogenetics Is Clearly Beneficial. *Syst. Biol.* 59: 277–287.
- 764 38. Le, S. Q., and O. Gascuel. 2008. An Improved General Amino Acid Replacement Matrix.  
765 *Mol. Biol. Evol.* 25: 1307–1320.
- 766 39. Hordijk, W., and O. Gascuel. 2005. Improving the efficiency of SPR moves in phylogenetic  
767 tree search methods based on maximum likelihood. *Bioinformatics* 21: 4338–4347.
- 768 40. Anisimova, M., and O. Gascuel. 2006. Approximate Likelihood-Ratio Test for Branches: A  
769 Fast, Accurate, and Powerful Alternative. *Syst. Biol.* 55: 539–552.

- 770 41. Akaike, H. 1998. Information Theory and an Extension of the Maximum Likelihood  
771 Principle. In Springer New York. 199–213.
- 772 42. Waterhouse, A. M., J. B. Procter, D. M. A. Martin, M. Clamp, and G. J. Barton. 2009.  
773 Jalview Version 2-A multiple sequence alignment editor and analysis workbench. *Bioinformatics*  
774 25: 1189–1191.
- 775 43. Herrero, J., M. Muffato, K. Beal, S. Fitzgerald, L. Gordon, M. Pignatelli, A. J. Vilella, S. M.  
776 J. Searle, R. Amode, S. Brent, W. Spooner, E. Kulesha, A. Yates, and P. Flicek. 2016. Ensembl  
777 comparative genomics resources. *Database* 2016: bav096.
- 778 44. Farnsworth, D. R., L. Saunders, and A. C. Miller. 2019. A Single-Cell Transcriptome Atlas  
779 for Zebrafish Development. *bioRxiv* 738344.
- 780 45. Zheng, G. X. Y., J. M. Terry, P. Belgrader, P. Ryvkin, Z. W. Bent, R. Wilson, S. B. Ziraldo,  
781 T. D. Wheeler, G. P. McDermott, J. Zhu, M. T. Gregory, J. Shuga, L. Montesclaros, J. G.  
782 Underwood, D. A. Masquelier, S. Y. Nishimura, M. Schnall-Levin, P. W. Wyatt, C. M. Hindson,  
783 R. Bharadwaj, A. Wong, K. D. Ness, L. W. Beppu, H. J. Deeg, C. McFarland, K. R. Loeb, W. J.  
784 Valente, N. G. Ericson, E. A. Stevens, J. P. Radich, T. S. Mikkelsen, B. J. Hindson, and J. H.  
785 Bielas. 2017. Massively parallel digital transcriptional profiling of single cells. *Nat. Commun.* 8:  
786 14049.
- 787 46. Satija, R., J. A. Farrell, D. Gennert, A. F. Schier, and A. Regev. 2015. Spatial reconstruction  
788 of single-cell gene expression data. *Nat. Biotechnol.* 33: 495–502.
- 789 47. R Core Team. 2017. R: A Language and Environment for Statistical Computing. .
- 790 48. Jao, L.-E., S. R. Wenthe, and W. Chen. 2013. Efficient multiplex biallelic zebrafish genome

- 791 editing using a CRISPR nuclease system. *Proc. Natl. Acad. Sci. U. S. A.* 110: 13904–9.
- 792 49. Sun, Y., Y. Huang, X. Li, C. C. Baldwin, Z. Zhou, Z. Yan, K. A. Crandall, Y. Zhang, X.  
793 Zhao, M. Wang, A. Wong, C. Fang, X. Zhang, H. Huang, J. V. Lopez, K. Kilfoyle, Y. Zhang, G.  
794 Ortí, B. Venkatesh, and Q. Shi. 2016. Fish-T1K (Transcriptomes of 1,000 Fishes) Project: Large-  
795 scale transcriptome data for fish evolution studies. *Gigascience* 5.
- 796 50. Woods, I. G., C. Wilson, B. Friedlander, P. Chang, D. K. Reyes, R. Nix, P. D. Kelly, F. Chu,  
797 J. H. Postlethwait, and W. S. Talbot. 2005. The zebrafish gene map defines ancestral vertebrate  
798 chromosomes. *Genome Res.* 15: 1307–14.
- 799 51. Bernut, A., J.-L. Herrmann, K. Kissa, J.-F. Dubremetz, J.-L. Gaillard, G. Lutfalla, and L.  
800 Kremer. 2014. *Mycobacterium abscessus* cording prevents phagocytosis and promotes abscess  
801 formation. *Proc. Natl. Acad. Sci.* 111: E943–E952.
- 802 52. Heumann, D., R. Lauener, and B. Ryffel. 2003. The dual role of LBP and CD14 in response  
803 to Gram-negative bacteria or Gram-negative compounds. *J. Endotoxin Res.* 9: 381–384.
- 804 53. Triantafilou, M., and K. Triantafilou. 2002. Lipopolysaccharide recognition: CD14, TLRs  
805 and the LPS-activation cluster. *Trends Immunol.* 23: 301–304.
- 806 54. Kim, S. J., and H. M. Kim. 2017. Dynamic lipopolysaccharide transfer cascade to  
807 TLR4/MD2 complex via LBP and CD14. *BMB Rep.* 50: 55–57.
- 808 55. Shapiro, R. A., M. D. Cunningham, K. Ratcliffe, C. Seachord, J. Blake, J. Bajorath, A.  
809 Aruffo, and R. P. Darveau. 1997. Identification of CD14 residues involved in specific  
810 lipopolysaccharide recognition. *Infect. Immun.* 65: 293–7.
- 811 56. Juan, T. S.-C., E. Hailman, M. J. Kelley, S. D. Wright, and H. S. Lichenstein. 1995.

- 812 Identification of a Domain in Soluble CD14 Essential for Lipopolysaccharide (LPS) Signaling  
813 but Not LPS Binding. *J. Biol. Chem.* 270: 17237–17242.
- 814 57. Zhou, Y., Q. Liang, W. Li, Y. Gu, X. Liao, W. Fang, and X. Li. 2016. Characterization and  
815 functional analysis of toll-like receptor 4 in Chinese soft-shelled turtle *Pelodiscus sinensis*. *Dev.*  
816 *Comp. Immunol.* 63: 128–135.
- 817 58. Madan, R., D. Golenbock, S. Divanovic, A. Trompette, S. F. Atabani, D. T. Golenbock, A.  
818 Visintin, R. W. Finberg, A. Tarakhovskiy, S. N. Vogel, Y. Belkaid, E. A. Kurt-Jones, and C. L.  
819 Karp. 2005. Negative Regulation of TLR4 Signaling by RP105. .
- 820 59. Hughes, L. C., G. Ortí, Y. Huang, Y. Sun, C. C. Baldwin, A. W. Thompson, D. Arcila, R.  
821 Betancur-R., C. Li, L. Becker, N. Bellora, X. Zhao, X. Li, M. Wang, C. Fang, B. Xie, Z. Zhou,  
822 H. Huang, S. Chen, B. Venkatesh, and Q. Shi. 2018. Comprehensive phylogeny of ray-finned  
823 fishes (Actinopterygii) based on transcriptomic and genomic data. *Proc. Natl. Acad. Sci.* 115:  
824 6249–6254.
- 825 60. Hedges, S. B., J. Dudley, and S. Kumar. 2006. TimeTree: a public knowledge-base of  
826 divergence times among organisms. *Bioinformatics* 22: 2971–2972.
- 827 61. Muroi, M., T. Ohnishi, and K.-I. Tanamoto. 2002. MD-2, a Novel Accessory Molecule, Is  
828 Involved in Species-Specific Actions of Salmonella Lipid A. *Infect. Immun.* 70: 3546–3550.
- 829 62. Hoshino, K., O. Takeuchi, T. Kawai, H. Sanjo, T. Ogawa, Y. Takeda, K. Takeda, and S.  
830 Akira. 1999. Cutting edge: Toll-like receptor 4 (TLR4)-deficient mice are hyporesponsive to  
831 lipopolysaccharide: evidence for TLR4 as the Lps gene product. *J. Immunol.* 162: 3749–52.
- 832 63. Yang, D., X. Zheng, S. Chen, Z. Wang, W. Xu, J. Tan, T. Hu, M. Hou, W. Wang, Z. Gu, Q.

- 833 Wang, R. Zhang, Y. Zhang, and Q. Liu. 2018. Sensing of cytosolic LPS through caspy2 pyrin  
834 domain mediates noncanonical inflammasome activation in zebrafish. *Nat. Commun.* 9: 3052.
- 835 64. Forn-Cuní, G., A. H. Meijer, and M. Varela. 2019. Zebrafish in Inflammasome Research.  
836 *Cells* 8: 901.
- 837 65. Mazon-Moya, M. J., A. R. Willis, V. Torraca, L. Boucontet, A. R. Shenoy, E. Colucci-  
838 Guyon, and S. Mostowy. 2017. Septins restrict inflammation and protect zebrafish larvae from  
839 *Shigella* infection. *PLOS Pathog.* 13: e1006467.
- 840 66. Jones, J. D. G., R. E. Vance, and J. L. Dangl. 2016. Intracellular innate immune surveillance  
841 devices in plants and animals. *Science (80-. )*. 354: aaf6395–aaf6395.
- 842 67. Bernheiden, M., J.-M. Heinrich, G. Minigo, C. Schutt, F. Stelter, M. Freeman, D. Golenbock,  
843 and R. S. Jack. 2001. LBP, CD14, TLR4 and the murine innate immune response to a peritoneal  
844 *Salmonella* infection. *J. Endotoxin Res.* 7: 447–450.
- 845 68. Loes, A. N., J. T. Bridgham, and M. J. Harms. 2018. Coevolution of the Toll-Like Receptor 4  
846 Complex with Calgranulins and Lipopolysaccharide. *Front. Immunol.* 9: 304.
- 847 69. Ehrchen, J. M., C. Sunderkotter, D. Foell, T. Vogl, and J. Roth. 2009. The endogenous Toll-  
848 like receptor 4 agonist S100A8/S100A9 (calprotectin) as innate amplifier of infection,  
849 autoimmunity, and cancer. *J. Leukoc. Biol.* 86: 557–566.
- 850 70. Ohto, U., K. Fukase, K. Miyake, and T. Shimizu. 2012. Structural basis of species-specific  
851 endotoxin sensing by innate immune receptor TLR4/MD-2. *Proc. Natl. Acad. Sci.* 109: 7421–  
852 7426.
- 853 71. Walsh, C., M. Gangloff, T. Monie, T. Smyth, B. Wei, T. J. McKinley, D. Maskell, N. Gay,



- 854 and C. Bryant. 2008. Elucidation of the MD-2/TLR4 Interface Required for Signaling by Lipid  
855 IVa. *J. Immunol.* 181: 1245–1254.
- 856 72. Anderson, J. A., A. N. Loes, G. L. Waddell, and M. J. Harms. 2019. Tracing the evolution of  
857 novel features of human Toll-like receptor 4. *Protein Sci.* 28: pro.3644.
- 858 73. Iliev, D. B., J. C. Roach, S. Mackenzie, J. V Planas, and F. W. Goetz. 2005. Endotoxin  
859 recognition: in fish or not in fish? *FEBS Lett.* 579: 6519–28.
- 860 74. Berczi, I., L. Bertók, and T. Bereznai. 1966. Comparative studies on the toxicity of  
861 *Escherichia coli* lipopolysaccharide endotoxin in various animal species. *Can. J. Microbiol.* 12:  
862 1070–1071.
- 863 75. Stafford, J. L., K. K. Ellestad, K. E. Magor, M. Belosevic, and B. G. Magor. 2003. A toll-like  
864 receptor (TLR) gene that is up-regulated in activated goldfish macrophages. *Dev. Comp.*  
865 *Immunol.* 27: 685–698.
- 866 76. MacKenzie, S., J. V. Planas, and F. W. Goetz. 2003. LPS-stimulated expression of a tumor  
867 necrosis factor-alpha mRNA in primary trout monocytes and in vitro differentiated macrophages.  
868 *Dev. Comp. Immunol.* 27: 393–400.
- 869 77. Pelegrín, P., J. García-Castillo, V. Mulero, and J. Meseguer. 2001. Interleukin-1 $\beta$  isolated  
870 from a marine fish up-regulated expression in macrophages following activation with  
871 lipopolysaccharide and lymphokines. *Cytokine* 16: 67–72.
- 872 78. Ishii, A., M. Kawasaki, M. Matsumoto, S. Tochinai, and T. Seya. 2007. Phylogenetic and  
873 expression analysis of amphibian *Xenopus* Toll-like receptors. *Immunogenetics* 59: 281–293.
- 874
